# Supplementary material
Source: PubMed Central journal article supplement (PMC6459619)
Supplement: NIHMS1510629-supplement-1.pdf [file NIHMS1510629-supplement-1.pdf]

# Supplementary Materials: High-throughput first principles search for new ferroelectrics

Kevin F. Garrity  
(Dated: January 5, 2018)

Supplementary materials for “High-throughput first principles search for new ferroelectrics” Includes structural data on all compounds.

## I. STRUCTURAL DATA

This section contains structural data for the high and low symmetry structures of proposed ferroelectrics.

### A. $\text{SrNb}_6\text{O}_{16}$

#### Non-polar

ICSD 60783<sup>4</sup>

Space Group = 38  
Full Formula (Sr1 Nb6 O16)  
Reduced Formula: SrNb6O16  
abc : 9.017667 9.017667 3.859704  
angles: 90.000000 90.000000 110.009663  
Sites (23)  
0 Sr 0.398500 0.601500 0.500000  
1 Nb 0.993902 0.006098 0.000000  
2 Nb 0.207569 0.792431 0.000000  
3 Nb 0.378259 0.257859 1.000000  
4 Nb 0.742141 0.621741 1.000000  
5 Nb 0.627663 0.999301 0.000000  
6 Nb 0.000699 0.372337 1.000000  
7 O 0.002828 0.997172 0.500000  
8 O 0.224374 0.775626 0.500000  
9 O 0.366568 0.291867 0.500000  
10 O 0.708133 0.633432 0.500000  
11 O 0.626481 0.001655 0.500000  
12 O 0.998345 0.373519 0.500000  
13 O 0.235588 0.013890 1.000000  
14 O 0.986110 0.764412 1.000000  
15 O 0.442310 0.812625 0.000000  
16 O 0.187375 0.557690 0.000000  
17 O 0.761732 0.854220 0.000000  
18 O 0.145780 0.238268 1.000000  
19 O 0.534385 0.166952 0.000000  
20 O 0.833048 0.465615 1.000000  
21 O 0.856734 0.143266 0.000000  
22 O 0.511475 0.488525 1.000000

#### Polar

Space Group = 8  
Full Formula (Sr1 Nb6 O16)  
Reduced Formula: SrNb6O16  
abc : 8.975020 8.975020 3.930378

angles: 89.705769 90.294231 110.229607  
 Sites (23)

|      |          |          |          |
|------|----------|----------|----------|
| 0 Sr | 0.398472 | 0.601528 | 0.494185 |
| 1 Nb | 0.995626 | 0.004374 | 0.063034 |
| 2 Nb | 0.209298 | 0.790702 | 0.964611 |
| 3 Nb | 0.377699 | 0.257918 | 0.977629 |
| 4 Nb | 0.742082 | 0.622301 | 0.977629 |
| 5 Nb | 0.629262 | 0.001380 | 0.954623 |
| 6 Nb | 0.998620 | 0.370738 | 0.954623 |
| 7 O  | 0.999641 | 0.000359 | 0.518978 |
| 8 O  | 0.221829 | 0.778171 | 0.498754 |
| 9 O  | 0.370179 | 0.289742 | 0.508752 |
| 10 O | 0.710258 | 0.629821 | 0.508752 |
| 11 O | 0.626485 | 0.995866 | 0.495997 |
| 12 O | 0.004134 | 0.373515 | 0.495997 |
| 13 O | 0.234536 | 0.014254 | 0.012973 |
| 14 O | 0.985746 | 0.765464 | 0.012973 |
| 15 O | 0.440806 | 0.813838 | 0.005906 |
| 16 O | 0.186162 | 0.559194 | 0.005906 |
| 17 O | 0.760372 | 0.852610 | 0.012941 |
| 18 O | 0.147390 | 0.239628 | 0.012941 |
| 19 O | 0.536121 | 0.166427 | 0.000061 |
| 20 O | 0.833573 | 0.463879 | 0.000061 |
| 21 O | 0.856484 | 0.143516 | 0.014057 |
| 22 O | 0.509695 | 0.490305 | 0.008604 |

Alternate-low energy structure

Space Group = 1  
 Full Formula (Sr1 Nb6 O16)  
 Reduced Formula: SrNb6O16  
 abc : 3.930916 8.973540 8.976735  
 angles: 69.746063 89.807687 89.537025  
 Sites (23)

|      |          |          |          |
|------|----------|----------|----------|
| 0 Sr | 0.493476 | 0.602413 | 0.600452 |
| 1 Nb | 0.054725 | 0.003845 | 0.004849 |
| 2 Nb | 0.959485 | 0.790935 | 0.790526 |
| 3 Nb | 0.973461 | 0.622521 | 0.257708 |
| 4 Nb | 0.976748 | 0.258121 | 0.623174 |
| 5 Nb | 0.060381 | 0.371746 | 0.001485 |
| 6 Nb | 0.950575 | 0.002063 | 0.370913 |
| 7 O  | 0.511439 | 0.999451 | 0.001012 |
| 8 O  | 0.494622 | 0.778721 | 0.777402 |
| 9 O  | 0.505055 | 0.630026 | 0.289431 |
| 10 O | 0.507712 | 0.290348 | 0.630540 |
| 11 O | 0.519292 | 0.373819 | 0.996552 |
| 12 O | 0.492069 | 0.996711 | 0.373555 |
| 13 O | 0.006399 | 0.765323 | 0.014331 |
| 14 O | 0.006428 | 0.014192 | 0.766224 |
| 15 O | 0.005008 | 0.559606 | 0.813706 |
| 16 O | 0.001622 | 0.814048 | 0.559305 |
| 17 O | 0.015492 | 0.239788 | 0.852780 |
| 18 O | 0.007397 | 0.852205 | 0.240241 |
| 19 O | 0.003497 | 0.463695 | 0.166866 |
| 20 O | 0.998404 | 0.166160 | 0.465007 |
| 21 O | 0.010220 | 0.143622 | 0.143558 |
| 22 O | 0.006487 | 0.490641 | 0.490379 |

B.  $\text{NaNb}_6\text{O}_{16}\text{F}$ **Non-polar**  
ICSD 24109<sup>5</sup>

Space Group = 38  
 Full Formula (Na1 Nb6 O15 F1)  
 Reduced Formula:  $\text{NaNb}_6\text{O}_{15}\text{F}$   
 abc : 8.996016 8.996016 3.887490  
 angles: 90.000000 90.000000 109.954098  
 Sites (23)

|      |          |          |          |
|------|----------|----------|----------|
| 0 Na | 0.403993 | 0.596007 | 0.500000 |
| 1 Nb | 0.998950 | 0.001050 | 1.000000 |
| 2 Nb | 0.217437 | 0.782563 | 1.000000 |
| 3 Nb | 0.376935 | 0.262472 | 0.000000 |
| 4 Nb | 0.737528 | 0.623065 | 1.000000 |
| 5 Nb | 0.627975 | 0.005242 | 0.000000 |
| 6 Nb | 0.994758 | 0.372025 | 1.000000 |
| 7 O  | 0.220751 | 0.779249 | 0.500000 |
| 8 O  | 0.362981 | 0.283193 | 0.500000 |
| 9 O  | 0.716807 | 0.637019 | 0.500000 |
| 10 O | 0.640783 | 0.007997 | 0.500000 |
| 11 O | 0.992003 | 0.359217 | 0.500000 |
| 12 O | 0.227551 | 0.010583 | 0.000000 |
| 13 O | 0.989417 | 0.772449 | 1.000000 |
| 14 O | 0.445298 | 0.819325 | 1.000000 |
| 15 O | 0.180675 | 0.554702 | 1.000000 |
| 16 O | 0.768521 | 0.857079 | 0.000000 |
| 17 O | 0.142921 | 0.231479 | 0.000000 |
| 18 O | 0.531765 | 0.165200 | 0.000000 |
| 19 O | 0.834800 | 0.468235 | 0.000000 |
| 20 O | 0.862695 | 0.137305 | 1.000000 |
| 21 O | 0.514101 | 0.485899 | 1.000000 |
| 22 F | 0.999353 | 0.000647 | 0.500000 |

**Polar**

Space Group = 8  
 Full Formula (Na1 Nb6 O15 F1)  
 Reduced Formula:  $\text{NaNb}_6\text{O}_{15}\text{F}$   
 abc : 8.946903 8.946903 3.970948  
 angles: 89.533486 90.466514 109.968577  
 Sites (23)

|      |          |          |          |
|------|----------|----------|----------|
| 0 Na | 0.595246 | 0.404754 | 0.525670 |
| 1 Nb | 0.000740 | 0.999260 | 0.994077 |
| 2 Nb | 0.781360 | 0.218640 | 0.055607 |
| 3 Nb | 0.262328 | 0.377633 | 0.035943 |
| 4 Nb | 0.622367 | 0.737672 | 0.035943 |
| 5 Nb | 0.005187 | 0.628468 | 0.932469 |
| 6 Nb | 0.371532 | 0.994813 | 0.932469 |
| 7 O  | 0.780687 | 0.219313 | 0.510310 |
| 8 O  | 0.280287 | 0.365461 | 0.493855 |
| 9 O  | 0.634539 | 0.719713 | 0.493855 |
| 10 O | 0.005350 | 0.636949 | 0.480625 |
| 11 O | 0.363051 | 0.994650 | 0.480625 |
| 12 O | 0.010809 | 0.227044 | 0.004016 |

|      |          |          |          |
|------|----------|----------|----------|
| 13 O | 0.772956 | 0.989191 | 0.004016 |
| 14 O | 0.819556 | 0.444254 | 0.993307 |
| 15 O | 0.555746 | 0.180444 | 0.993307 |
| 16 O | 0.856232 | 0.766434 | 0.987046 |
| 17 O | 0.233566 | 0.143768 | 0.987046 |
| 18 O | 0.166859 | 0.534718 | 0.994023 |
| 19 O | 0.465282 | 0.833141 | 0.994023 |
| 20 O | 0.138727 | 0.861273 | 0.993159 |
| 21 O | 0.487212 | 0.512788 | 0.994208 |
| 22 F | 0.002384 | 0.997616 | 0.494401 |

Alternate low energy

Space Group = 1

Full Formula (Na1 Nb6 O15 F1)

Reduced Formula: NaNb6O15F

abc : 3.968460 8.956992 8.946166

angles: 69.962292 89.481844 89.753396

Sites (23)

|      |          |          |          |
|------|----------|----------|----------|
| 0 Na | 0.526026 | 0.407124 | 0.401169 |
| 1 Nb | 0.982931 | 0.999062 | 0.999624 |
| 2 Nb | 0.047429 | 0.218250 | 0.218725 |
| 3 Nb | 0.032559 | 0.738182 | 0.378131 |
| 4 Nb | 0.031107 | 0.377320 | 0.737380 |
| 5 Nb | 0.924874 | 0.994482 | 0.628890 |
| 6 Nb | 0.049917 | 0.628588 | 0.994395 |
| 7 O  | 0.502900 | 0.219540 | 0.218806 |
| 8 O  | 0.491089 | 0.720758 | 0.365989 |
| 9 O  | 0.489050 | 0.364924 | 0.719251 |
| 10 O | 0.472830 | 0.994509 | 0.637295 |
| 11 O | 0.502303 | 0.636648 | 0.994833 |
| 12 O | 0.993990 | 0.988928 | 0.227642 |
| 13 O | 0.996576 | 0.226713 | 0.989234 |
| 14 O | 0.985543 | 0.179969 | 0.444252 |
| 15 O | 0.991565 | 0.444221 | 0.180530 |
| 16 O | 0.980071 | 0.143384 | 0.766688 |
| 17 O | 0.990499 | 0.766313 | 0.144104 |
| 18 O | 0.989431 | 0.833160 | 0.535447 |
| 19 O | 0.998067 | 0.534354 | 0.833151 |
| 20 O | 0.986667 | 0.861233 | 0.861700 |
| 21 O | 0.989647 | 0.513167 | 0.512709 |
| 22 F | 0.484933 | 0.997175 | 0.998055 |

### C. $\text{RbCa}_2\text{Nb}_3\text{O}_{10}$

**Non-polar**

ICSD 260289<sup>6</sup>

Space Group = 123

Full Formula (Rb1 Ca2 Nb3 O10)

Reduced Formula: RbCa2Nb3O10

abc : 3.900514 3.900514 14.996799

angles: 90.000000 90.000000 90.000000

Sites (16)

|      |          |          |          |
|------|----------|----------|----------|
| 0 Rb | 0.500000 | 0.500000 | 0.500000 |
| 1 Ca | 0.500000 | 0.500000 | 0.850282 |

|      |          |          |          |
|------|----------|----------|----------|
| 2 Ca | 0.500000 | 0.500000 | 0.149718 |
| 3 Nb | 0.000000 | 0.000000 | 0.000000 |
| 4 Nb | 0.000000 | 0.000000 | 0.718679 |
| 5 Nb | 0.000000 | 0.000000 | 0.281321 |
| 6 O  | 0.000000 | 0.500000 | 0.000000 |
| 7 O  | 0.500000 | 0.000000 | 0.000000 |
| 8 O  | 0.000000 | 0.000000 | 0.870367 |
| 9 O  | 0.000000 | 0.000000 | 0.129633 |
| 10 O | 0.000000 | 0.500000 | 0.746924 |
| 11 O | 0.500000 | 0.000000 | 0.746924 |
| 12 O | 0.000000 | 0.500000 | 0.253076 |
| 13 O | 0.500000 | 0.000000 | 0.253076 |
| 14 O | 0.000000 | 0.000000 | 0.600394 |
| 15 O | 0.000000 | 0.000000 | 0.399606 |

### Polar

Space Group = 7

Full Formula (Rb<sub>2</sub> Ca<sub>4</sub> Nb<sub>6</sub> O<sub>20</sub>)

Reduced Formula: RbCa<sub>2</sub>Nb<sub>3</sub>O<sub>10</sub>

abc : 5.460413 5.426493 14.970151

angles: 90.000000 90.526522 90.000000

Sites (32)

|       |          |          |          |
|-------|----------|----------|----------|
| 0 Rb  | 0.481742 | 0.239793 | 0.510061 |
| 1 Rb  | 0.981742 | 0.760207 | 0.510061 |
| 2 Ca  | 0.473565 | 0.260809 | 0.149634 |
| 3 Ca  | 0.461092 | 0.252237 | 0.856661 |
| 4 Ca  | 0.973565 | 0.739191 | 0.149634 |
| 5 Ca  | 0.961092 | 0.747763 | 0.856661 |
| 6 Nb  | 0.987605 | 0.240946 | 0.997906 |
| 7 Nb  | 0.995831 | 0.242838 | 0.284453 |
| 8 Nb  | 0.996791 | 0.250594 | 0.717021 |
| 9 Nb  | 0.487605 | 0.759054 | 0.997906 |
| 10 Nb | 0.495831 | 0.757162 | 0.284453 |
| 11 Nb | 0.496791 | 0.749406 | 0.717021 |
| 12 O  | 0.829237 | 0.929853 | 0.018033 |
| 13 O  | 0.706454 | 0.441685 | 0.974002 |
| 14 O  | 0.011177 | 0.319822 | 0.123643 |
| 15 O  | 0.036032 | 0.169426 | 0.872257 |
| 16 O  | 0.734191 | 0.014948 | 0.239938 |
| 17 O  | 0.772194 | 0.520955 | 0.268832 |
| 18 O  | 0.802155 | 0.953276 | 0.725587 |
| 19 O  | 0.728614 | 0.467469 | 0.759900 |
| 20 O  | 0.995050 | 0.195536 | 0.400615 |
| 21 O  | 0.987958 | 0.300328 | 0.600111 |
| 22 O  | 0.206454 | 0.558315 | 0.974002 |
| 23 O  | 0.329237 | 0.070147 | 0.018033 |
| 24 O  | 0.511177 | 0.680178 | 0.123643 |
| 25 O  | 0.536032 | 0.830574 | 0.872257 |
| 26 O  | 0.272194 | 0.479045 | 0.268832 |
| 27 O  | 0.234191 | 0.985052 | 0.239938 |
| 28 O  | 0.228614 | 0.532531 | 0.759900 |
| 29 O  | 0.302155 | 0.046724 | 0.725587 |
| 30 O  | 0.495050 | 0.804464 | 0.400615 |
| 31 O  | 0.487958 | 0.699672 | 0.600111 |

D.  $\text{BaBi}_2\text{Ta}_2\text{O}_9$ **Non-polar**

ICSD 92058, 93752

Space Group = 139

Full Formula (Ba1 Ta2 Bi2 O9)

Reduced Formula: BaTa2Bi2O9

abc : 12.626511 12.626511 12.626511

angles: 162.076460 162.076460 25.453271

Sites (14)

|      |          |          |          |
|------|----------|----------|----------|
| 0 Ba | 0.000000 | 0.000000 | 0.000000 |
| 1 Ta | 0.588742 | 0.588742 | 0.000000 |
| 2 Ta | 0.411258 | 0.411258 | 0.000000 |
| 3 Bi | 0.799023 | 0.799023 | 0.000000 |
| 4 Bi | 0.200977 | 0.200977 | 0.000000 |
| 5 O  | 0.500000 | 0.500000 | 0.000000 |
| 6 O  | 0.664841 | 0.664841 | 0.000000 |
| 7 O  | 0.335159 | 0.335159 | 0.000000 |
| 8 O  | 0.750000 | 0.250000 | 0.500000 |
| 9 O  | 0.250000 | 0.750000 | 0.500000 |
| 10 O | 0.581338 | 0.081338 | 0.500000 |
| 11 O | 0.081338 | 0.581338 | 0.500000 |
| 12 O | 0.418662 | 0.918662 | 0.500000 |
| 13 O | 0.918662 | 0.418662 | 0.500000 |

**Polar**

Space Group = 36

Full Formula (Ba2 Ta4 Bi4 O18)

Reduced Formula: BaTa2Bi2O9

abc : 12.884322 12.884322 5.609108

angles: 90.000000 90.000000 154.929890

Sites (28)

|      |          |          |          |
|------|----------|----------|----------|
| 0 Ba | 0.751948 | 0.751948 | 0.980406 |
| 1 Ba | 0.248052 | 0.248052 | 0.480406 |
| 2 Ta | 0.166813 | 0.338151 | 0.984262 |
| 3 Ta | 0.833187 | 0.661849 | 0.484262 |
| 4 Ta | 0.338151 | 0.166813 | 0.984262 |
| 5 Ta | 0.661849 | 0.833187 | 0.484262 |
| 6 Bi | 0.519791 | 0.921429 | 0.080586 |
| 7 Bi | 0.480209 | 0.078571 | 0.580586 |
| 8 Bi | 0.921429 | 0.519791 | 0.080586 |
| 9 Bi | 0.078571 | 0.480209 | 0.580586 |
| 10 O | 0.460894 | 0.141567 | 0.965749 |
| 11 O | 0.539106 | 0.858433 | 0.465749 |
| 12 O | 0.141567 | 0.460894 | 0.965749 |
| 13 O | 0.858433 | 0.539106 | 0.465749 |
| 14 O | 0.574050 | 0.424740 | 0.227022 |
| 15 O | 0.425950 | 0.575260 | 0.727022 |
| 16 O | 0.424740 | 0.574050 | 0.227022 |
| 17 O | 0.575260 | 0.425950 | 0.727022 |
| 18 O | 0.736964 | 0.234018 | 0.288604 |
| 19 O | 0.263036 | 0.765982 | 0.788604 |
| 20 O | 0.234018 | 0.736964 | 0.288604 |
| 21 O | 0.765982 | 0.263036 | 0.788604 |

|      |          |          |          |
|------|----------|----------|----------|
| 22 0 | 0.234752 | 0.234752 | 0.975836 |
| 23 0 | 0.765248 | 0.765248 | 0.475836 |
| 24 0 | 0.919295 | 0.086038 | 0.725661 |
| 25 0 | 0.080705 | 0.913962 | 0.225661 |
| 26 0 | 0.086038 | 0.919295 | 0.725661 |
| 27 0 | 0.913962 | 0.080705 | 0.225661 |

### E. LiScAs<sub>2</sub>O<sub>7</sub>

**Non-polar**  
ICSD 161499<sup>7</sup>

Space Group = 5  
Full Formula (Li1 Sc1 As2 O7)  
Reduced Formula: LiScAs2O7  
abc : 5.479358 5.479358 4.886724  
angles: 81.380919 98.619081 76.658134  
Sites (11)  
0 Li 0.248257 0.248257 0.500000  
1 Sc 0.629209 0.629209 0.500000  
2 As 0.744375 0.181808 0.091957  
3 As 0.181808 0.744375 0.908043  
4 O 0.860982 0.355948 0.317506  
5 O 0.355948 0.860982 0.682494  
6 O 0.610499 0.964711 0.250562  
7 O 0.964711 0.610499 0.749438  
8 O 0.039454 0.039454 0.000000  
9 O 0.550202 0.338414 0.778226  
10 O 0.338414 0.550202 0.221774

### Polar

Space Group = 1  
Full Formula (Li1 Sc1 As2 O7)  
Reduced Formula: LiScAs2O7  
abc : 4.904965 5.502197 5.426075  
angles: 103.017926 98.384543 98.313286  
Sites (11)  
0 Li 0.400711 0.261942 0.794925  
1 Sc 0.504527 0.628371 0.370512  
2 As 0.915986 0.176805 0.249631  
3 As 0.099622 0.743621 0.809983  
4 O 0.678828 0.343520 0.140753  
5 O 0.318668 0.865493 0.631307  
6 O 0.770055 0.937703 0.361935  
7 O 0.262256 0.595945 0.016441  
8 O 0.055813 0.054739 0.971764  
9 O 0.210073 0.350736 0.460435  
10 O 0.775042 0.572400 0.674873

### F. YSF

**Non-polar**  
ICSD 2597<sup>1</sup>

Space Group = 194

Full Formula (Y4 S4 F4)

Reduced Formula: YSF

abc : 4.008530 4.008530 16.634373

angles: 90.000000 90.000000 120.000000

Sites (12)

|      |          |          |          |
|------|----------|----------|----------|
| 0 Y  | 0.666667 | 0.333333 | 0.750000 |
| 1 Y  | 0.333333 | 0.666667 | 0.250000 |
| 2 Y  | 0.000000 | 0.000000 | 0.500000 |
| 3 Y  | 0.000000 | 0.000000 | 0.000000 |
| 4 S  | 0.666667 | 0.333333 | 0.585895 |
| 5 S  | 0.333333 | 0.666667 | 0.414105 |
| 6 S  | 0.333333 | 0.666667 | 0.085895 |
| 7 S  | 0.666667 | 0.333333 | 0.914105 |
| 8 F  | 0.666667 | 0.333333 | 0.250000 |
| 9 F  | 0.333333 | 0.666667 | 0.750000 |
| 10 F | 0.000000 | 0.000000 | 0.750000 |
| 11 F | 0.000000 | 0.000000 | 0.250000 |

**Polar**

Space Group = 186

Full Formula (Y4 S4 F4)

Reduced Formula: YSF

abc : 3.963361 3.963361 16.755899

angles: 90.000000 90.000000 120.000000

Sites (12)

|      |          |          |          |
|------|----------|----------|----------|
| 0 Y  | 0.666667 | 0.333333 | 0.749842 |
| 1 Y  | 0.333333 | 0.666667 | 0.249842 |
| 2 Y  | 0.000000 | 0.000000 | 0.499582 |
| 3 Y  | 0.000000 | 0.000000 | 0.999582 |
| 4 S  | 0.666667 | 0.333333 | 0.586677 |
| 5 S  | 0.333333 | 0.666667 | 0.413442 |
| 6 S  | 0.333333 | 0.666667 | 0.086677 |
| 7 S  | 0.666667 | 0.333333 | 0.913442 |
| 8 F  | 0.666667 | 0.333333 | 0.228329 |
| 9 F  | 0.333333 | 0.666667 | 0.728329 |
| 10 F | 0.000000 | 0.000000 | 0.772287 |
| 11 F | 0.000000 | 0.000000 | 0.272287 |

Anti-polar

Space Group = 164

Full Formula (Y4 S4 F4)

Reduced Formula: YSF

abc : 3.965357 3.965357 16.760398

angles: 90.000000 90.000000 120.000000

Sites (12)

|     |          |          |          |
|-----|----------|----------|----------|
| 0 Y | 0.333333 | 0.666667 | 0.250301 |
| 1 Y | 0.666667 | 0.333333 | 0.749699 |
| 2 Y | 0.000000 | 0.000000 | 0.500000 |
| 3 Y | 0.000000 | 0.000000 | 0.000000 |
| 4 S | 0.333333 | 0.666667 | 0.413553 |
| 5 S | 0.666667 | 0.333333 | 0.586447 |
| 6 S | 0.666667 | 0.333333 | 0.913219 |
| 7 S | 0.333333 | 0.666667 | 0.086781 |



|      |          |          |          |
|------|----------|----------|----------|
| 8 F  | 0.333333 | 0.666667 | 0.771576 |
| 9 F  | 0.666667 | 0.333333 | 0.228424 |
| 10 F | 0.000000 | 0.000000 | 0.272384 |
| 11 F | 0.000000 | 0.000000 | 0.727616 |

### G. $\text{CuBiW}_2\text{O}_8$

#### Non-polar

Space Group = 2  
 Full Formula (Cu1 Bi1 W2 O8)  
 Reduced Formula:  $\text{CuBi(WO}_4)_2$   
 abc : 4.954784 6.002433 6.057345  
 angles: 109.232204 91.907057 113.168425  
 Sites (12)

|      |          |          |          |
|------|----------|----------|----------|
| 0 Cu | 0.000000 | 0.000000 | 0.000000 |
| 1 Bi | 0.500000 | 0.000000 | 0.500000 |
| 2 W  | 0.256161 | 0.523911 | 0.833206 |
| 3 W  | 0.743839 | 0.476089 | 0.166794 |
| 4 O  | 0.467319 | 0.310039 | 0.835525 |
| 5 O  | 0.532681 | 0.689961 | 0.164475 |
| 6 O  | 0.003780 | 0.276267 | 0.565620 |
| 7 O  | 0.996220 | 0.723733 | 0.434380 |
| 8 O  | 0.036832 | 0.704840 | 0.981538 |
| 9 O  | 0.963168 | 0.295160 | 0.018462 |
| 10 O | 0.512774 | 0.758107 | 0.731189 |
| 11 O | 0.487226 | 0.241893 | 0.268811 |

#### Polar

ICSD 67569<sup>8</sup>

Space Group = 1  
 Full Formula (Cu1 Bi1 W2 O8)  
 Reduced Formula:  $\text{CuBi(WO}_4)_2$   
 abc : 4.952819 6.062362 5.998570  
 angles: 109.259503 113.207528 91.708300  
 Sites (12)

|      |          |          |          |
|------|----------|----------|----------|
| 0 Cu | 0.177536 | 0.245262 | 0.122987 |
| 1 Bi | 0.634674 | 0.709085 | 0.095901 |
| 2 W  | 0.392890 | 0.042142 | 0.620538 |
| 3 W  | 0.881866 | 0.375136 | 0.574592 |
| 4 O  | 0.175435 | 0.193418 | 0.803232 |
| 5 O  | 0.639700 | 0.933500 | 0.852003 |
| 6 O  | 0.136291 | 0.777285 | 0.370075 |
| 7 O  | 0.102540 | 0.230932 | 0.393192 |
| 8 O  | 0.615018 | 0.471235 | 0.336001 |
| 9 O  | 0.127222 | 0.645307 | 0.818895 |
| 10 O | 0.607054 | 0.041943 | 0.408491 |
| 11 O | 0.670973 | 0.370656 | 0.788294 |

### H. $\text{PbGa}_2\text{O}_4$

#### Non-polar

Space Group = 190  
 Full Formula (Ga<sub>4</sub> Pb<sub>2</sub> O<sub>8</sub>)  
 Reduced Formula: Ga<sub>2</sub>PbO<sub>4</sub>  
 abc : 5.232320 5.232320 8.880171  
 angles: 90.000000 90.000000 120.000000  
 Sites (14)

|      |          |          |          |
|------|----------|----------|----------|
| 0 Ga | 0.666667 | 0.333333 | 0.546082 |
| 1 Ga | 0.333333 | 0.666667 | 0.453918 |
| 2 Ga | 0.666667 | 0.333333 | 0.953918 |
| 3 Ga | 0.333333 | 0.666667 | 0.046082 |
| 4 Pb | 0.000000 | 0.000000 | 0.750000 |
| 5 Pb | 0.000000 | 0.000000 | 0.250000 |
| 6 O  | 0.666667 | 0.333333 | 0.750000 |
| 7 O  | 0.333333 | 0.666667 | 0.250000 |
| 8 O  | 0.685705 | 0.685705 | 0.000000 |
| 9 O  | 0.000000 | 0.314295 | 0.000000 |
| 10 O | 0.314295 | 0.000000 | 0.000000 |
| 11 O | 0.314295 | 0.000000 | 0.500000 |
| 12 O | 0.685705 | 0.685705 | 0.500000 |
| 13 O | 0.000000 | 0.314295 | 0.500000 |

**Polar**  
 ICSD 80129, 33533

Space Group = 40  
 Full Formula (Ga<sub>4</sub> Pb<sub>2</sub> O<sub>8</sub>)  
 Reduced Formula: Ga<sub>2</sub>PbO<sub>4</sub>  
 abc : 5.376237 5.376237 8.570045  
 angles: 90.000000 90.000000 121.472135  
 Sites (14)

|      |          |          |          |
|------|----------|----------|----------|
| 0 Ga | 0.300293 | 0.646664 | 0.052211 |
| 1 Ga | 0.300293 | 0.646664 | 0.447789 |
| 2 Ga | 0.646664 | 0.300293 | 0.947789 |
| 3 Ga | 0.646664 | 0.300293 | 0.552211 |
| 4 Pb | 0.987157 | 0.039054 | 0.250000 |
| 5 Pb | 0.039054 | 0.987157 | 0.750000 |
| 6 O  | 0.003787 | 0.641350 | 0.560950 |
| 7 O  | 0.003787 | 0.641350 | 0.939050 |
| 8 O  | 0.641350 | 0.003787 | 0.439050 |
| 9 O  | 0.641350 | 0.003787 | 0.060950 |
| 10 O | 0.522080 | 0.136299 | 0.750000 |
| 11 O | 0.136299 | 0.522080 | 0.250000 |
| 12 O | 0.329665 | 0.329665 | 0.500000 |
| 13 O | 0.329665 | 0.329665 | 0.000000 |

## I. PbAl<sub>2</sub>O<sub>4</sub>

### Non-polar

Space Group = 190  
 Full Formula (Al<sub>4</sub> Pb<sub>2</sub> O<sub>8</sub>)  
 Reduced Formula: Al<sub>2</sub>PbO<sub>4</sub>  
 abc : 5.111914 5.111914 8.729952  
 angles: 90.000000 90.000000 120.000000

## Sites (14)

|      |          |          |          |
|------|----------|----------|----------|
| 0 Al | 0.666667 | 0.333333 | 0.551620 |
| 1 Al | 0.333333 | 0.666667 | 0.448380 |
| 2 Al | 0.666667 | 0.333333 | 0.948380 |
| 3 Al | 0.333333 | 0.666667 | 0.051620 |
| 4 Pb | 0.000000 | 0.000000 | 0.750000 |
| 5 Pb | 0.000000 | 0.000000 | 0.250000 |
| 6 O  | 0.666667 | 0.333333 | 0.750000 |
| 7 O  | 0.333333 | 0.666667 | 0.250000 |
| 8 O  | 0.665287 | 0.665287 | 0.000000 |
| 9 O  | 0.000000 | 0.334713 | 0.000000 |
| 10 O | 0.334713 | 0.000000 | 0.000000 |
| 11 O | 0.334713 | 0.000000 | 0.500000 |
| 12 O | 0.665287 | 0.665287 | 0.500000 |
| 13 O | 0.000000 | 0.334713 | 0.500000 |

**Polar**

ICSD 80128, 33532

Space Group = 40

Full Formula (Al<sub>4</sub> Pb<sub>2</sub> O<sub>8</sub>)Reduced Formula: Al<sub>2</sub>PbO<sub>4</sub>

abc : 5.267321 5.267321 8.469406

angles: 90.000000 90.000000 122.123141

## Sites (14)

|      |          |          |          |
|------|----------|----------|----------|
| 0 Al | 0.295736 | 0.640325 | 0.054038 |
| 1 Al | 0.295736 | 0.640325 | 0.445962 |
| 2 Al | 0.640325 | 0.295736 | 0.945962 |
| 3 Al | 0.640325 | 0.295736 | 0.554038 |
| 4 Pb | 0.974379 | 0.030932 | 0.250000 |
| 5 Pb | 0.030932 | 0.974379 | 0.750000 |
| 6 O  | 0.001784 | 0.624613 | 0.555812 |
| 7 O  | 0.001784 | 0.624613 | 0.944188 |
| 8 O  | 0.624613 | 0.001784 | 0.444188 |
| 9 O  | 0.624613 | 0.001784 | 0.055812 |
| 10 O | 0.535785 | 0.159651 | 0.750000 |
| 11 O | 0.159651 | 0.535785 | 0.250000 |
| 12 O | 0.351220 | 0.351220 | 0.500000 |
| 13 O | 0.351220 | 0.351220 | 1.000000 |

**J. LiV<sub>2</sub>O<sub>5</sub>****Non-polar**

Space Group = 59

Full Formula (Li<sub>2</sub> V<sub>4</sub> O<sub>10</sub>)Reduced Formula: LiV<sub>2</sub>O<sub>5</sub>

abc : 3.557338 4.592446 11.260591

angles: 90.000000 90.000000 90.000000

## Sites (16)

|      |          |          |          |
|------|----------|----------|----------|
| 0 Li | 0.000000 | 0.278366 | 0.500000 |
| 1 Li | 0.500000 | 0.721634 | 0.000000 |
| 2 V  | 0.000000 | 0.113061 | 0.151304 |
| 3 V  | 0.500000 | 0.886939 | 0.651304 |

|      |          |          |          |
|------|----------|----------|----------|
| 4 V  | 0.500000 | 0.886939 | 0.348696 |
| 5 V  | 0.000000 | 0.113061 | 0.848696 |
| 6 O  | 0.000000 | 0.018665 | 0.322835 |
| 7 O  | 0.500000 | 0.981335 | 0.822835 |
| 8 O  | 0.500000 | 0.981335 | 0.177165 |
| 9 O  | 0.000000 | 0.018665 | 0.677165 |
| 10 O | 0.500000 | 0.023139 | 0.500000 |
| 11 O | 0.000000 | 0.976861 | 0.000000 |
| 12 O | 0.500000 | 0.539234 | 0.366075 |
| 13 O | 0.000000 | 0.460766 | 0.866075 |
| 14 O | 0.000000 | 0.460766 | 0.133925 |
| 15 O | 0.500000 | 0.539234 | 0.633925 |

**Polar**ICSD 88641,88642, 88643<sup>9</sup>

Space Group = 31

Full Formula (Li<sub>2</sub> V<sub>4</sub> O<sub>10</sub>)Reduced Formula: LiV<sub>2</sub>O<sub>5</sub>

abc : 3.534100 4.636708 11.339180

angles: 90.000000 90.000000 90.000000

Sites (16)

|      |          |          |          |
|------|----------|----------|----------|
| 0 Li | 0.000000 | 0.303744 | 0.290003 |
| 1 Li | 0.500000 | 0.696256 | 0.790003 |
| 2 V  | 0.500000 | 0.907894 | 0.100472 |
| 3 V  | 0.000000 | 0.092106 | 0.600472 |
| 4 V  | 0.000000 | 0.124728 | 0.900233 |
| 5 V  | 0.500000 | 0.875272 | 0.400233 |
| 6 O  | 0.000000 | 0.470708 | 0.877523 |
| 7 O  | 0.500000 | 0.529292 | 0.377523 |
| 8 O  | 0.000000 | 0.033999 | 0.069893 |
| 9 O  | 0.500000 | 0.966001 | 0.569893 |
| 10 O | 0.500000 | 0.563874 | 0.111757 |
| 11 O | 0.000000 | 0.436126 | 0.611757 |
| 12 O | 0.500000 | 0.026744 | 0.252137 |
| 13 O | 0.000000 | 0.973256 | 0.752137 |
| 14 O | 0.500000 | 0.990438 | 0.926682 |
| 15 O | 0.000000 | 0.009562 | 0.426682 |

**K. NaVO<sub>2</sub>F<sub>2</sub>****Non-polar**

Space Group = 11

Full Formula (Na<sub>2</sub> V<sub>2</sub> O<sub>4</sub> F<sub>4</sub>)Reduced Formula: NaV(OF)<sub>2</sub>

abc : 6.451637 3.516552 7.214677

angles: 90.000000 109.429458 90.000000

Sites (12)

|      |          |          |          |
|------|----------|----------|----------|
| 0 Na | 0.372057 | 0.250000 | 0.782104 |
| 1 Na | 0.627943 | 0.750000 | 0.217896 |
| 2 V  | 0.867255 | 0.750000 | 0.790643 |
| 3 V  | 0.132745 | 0.250000 | 0.209357 |
| 4 O  | 0.092023 | 0.750000 | 0.136970 |
| 5 O  | 0.907977 | 0.250000 | 0.863030 |

|      |          |          |          |
|------|----------|----------|----------|
| 6 O  | 0.279484 | 0.250000 | 0.435597 |
| 7 O  | 0.720516 | 0.750000 | 0.564403 |
| 8 F  | 0.859206 | 0.250000 | 0.240436 |
| 9 F  | 0.140794 | 0.750000 | 0.759564 |
| 10 F | 0.373255 | 0.250000 | 0.110634 |
| 11 F | 0.626745 | 0.750000 | 0.889366 |

**Polar**ICSD 75418<sup>10</sup>

Space Group = 4

Full Formula (Na<sub>2</sub> V<sub>2</sub> O<sub>4</sub> F<sub>4</sub>)Reduced Formula: NaV(OF)<sub>2</sub>

abc : 6.417150 3.552008 7.202376

angles: 90.000000 109.411802 90.000000

Sites (12)

|      |          |          |          |
|------|----------|----------|----------|
| 0 Na | 0.372117 | 0.224124 | 0.781141 |
| 1 Na | 0.627883 | 0.724124 | 0.218859 |
| 2 V  | 0.867873 | 0.765980 | 0.791285 |
| 3 V  | 0.132127 | 0.265980 | 0.208715 |
| 4 O  | 0.090989 | 0.737530 | 0.137277 |
| 5 O  | 0.909011 | 0.237530 | 0.862723 |
| 6 O  | 0.278897 | 0.268370 | 0.435809 |
| 7 O  | 0.721103 | 0.768370 | 0.564191 |
| 8 F  | 0.857291 | 0.222259 | 0.237581 |
| 9 F  | 0.142709 | 0.722259 | 0.762419 |
| 10 F | 0.372090 | 0.222637 | 0.110345 |
| 11 F | 0.627910 | 0.722637 | 0.889655 |

**L. SbW<sub>2</sub>O<sub>6</sub>****Non-polar**

Space Group = 14

Full Formula (Sb<sub>4</sub> W<sub>2</sub> O<sub>12</sub>)Reduced Formula: Sb<sub>2</sub>W<sub>0</sub>O<sub>6</sub>

abc : 5.523370 4.937108 9.248750

angles: 90.000000 94.847812 90.000000

Sites (18)

|      |          |          |          |
|------|----------|----------|----------|
| 0 Sb | 0.854223 | 0.455433 | 0.666649 |
| 1 Sb | 0.645777 | 0.955433 | 0.333351 |
| 2 Sb | 0.145777 | 0.544567 | 0.333351 |
| 3 Sb | 0.354223 | 0.044567 | 0.666649 |
| 4 W  | 0.000000 | 0.000000 | 0.000000 |
| 5 W  | 0.500000 | 0.500000 | 0.000000 |
| 6 O  | 0.730483 | 0.761247 | 0.943209 |
| 7 O  | 0.769517 | 0.261247 | 0.056791 |
| 8 O  | 0.269517 | 0.238753 | 0.056791 |
| 9 O  | 0.230483 | 0.738753 | 0.943209 |
| 10 O | 0.012914 | 0.853484 | 0.189566 |
| 11 O | 0.487086 | 0.353484 | 0.810434 |
| 12 O | 0.987086 | 0.146516 | 0.810434 |
| 13 O | 0.512914 | 0.646516 | 0.189566 |
| 14 O | 0.642763 | 0.176526 | 0.561105 |
| 15 O | 0.857237 | 0.676526 | 0.438895 |

|      |          |          |          |
|------|----------|----------|----------|
| 16 0 | 0.357237 | 0.823474 | 0.438895 |
| 17 0 | 0.142763 | 0.323474 | 0.561105 |

**Polar**  
ICSD 75595<sup>11</sup>

Space Group = 4

Full Formula (Sb<sub>4</sub> W<sub>2</sub> O<sub>12</sub>)

Reduced Formula: Sb<sub>2</sub>W<sub>0</sub>O<sub>6</sub>

abc : 5.557749 4.990369 9.198174

angles: 90.000000 95.389320 90.000000

Sites (18)

|      |          |          |          |
|------|----------|----------|----------|
| 0 Sb | 0.107099 | 0.952317 | 0.666038 |
| 1 Sb | 0.892901 | 0.452317 | 0.333962 |
| 2 Sb | 0.605096 | 0.548741 | 0.667591 |
| 3 Sb | 0.394904 | 0.048741 | 0.332409 |
| 4 W  | 0.755418 | 0.963650 | 0.008139 |
| 5 W  | 0.244582 | 0.463650 | 0.991861 |
| 6 O  | 0.736893 | 0.860887 | 0.809320 |
| 7 O  | 0.263107 | 0.360887 | 0.190680 |
| 8 O  | 0.970164 | 0.268410 | 0.941003 |
| 9 O  | 0.029836 | 0.768410 | 0.058997 |
| 10 O | 0.389040 | 0.817103 | 0.557543 |
| 11 O | 0.610960 | 0.317103 | 0.442457 |
| 12 O | 0.471971 | 0.225733 | 0.942583 |
| 13 O | 0.528029 | 0.725733 | 0.057417 |
| 14 O | 0.892421 | 0.675639 | 0.562651 |
| 15 O | 0.107579 | 0.175639 | 0.437349 |
| 16 O | 0.759007 | 0.148071 | 0.188505 |
| 17 O | 0.240993 | 0.648071 | 0.811495 |

### M. V<sub>2</sub>MoO<sub>8</sub>

**Non-polar**

Space Group = 65

Full Formula (V<sub>2</sub> Mo<sub>1</sub> O<sub>8</sub>)

Reduced Formula: V<sub>2</sub>Mo<sub>0</sub>O<sub>8</sub>

abc : 10.011173 10.011173 3.662590

angles: 90.000000 90.000000 158.303585

Sites (11)

|      |          |          |          |
|------|----------|----------|----------|
| 0 V  | 0.813557 | 0.186443 | 0.000000 |
| 1 V  | 0.186443 | 0.813557 | 0.000000 |
| 2 Mo | 0.000000 | 0.000000 | 0.000000 |
| 3 O  | 0.810497 | 0.189503 | 0.500000 |
| 4 O  | 0.189503 | 0.810497 | 0.500000 |
| 5 O  | 0.292653 | 0.707347 | 0.000000 |
| 6 O  | 0.707347 | 0.292653 | 0.000000 |
| 7 O  | 0.000000 | 0.000000 | 0.500000 |
| 8 O  | 0.903284 | 0.096716 | 0.000000 |
| 9 O  | 0.096716 | 0.903284 | 0.000000 |
| 10 O | 0.500000 | 0.500000 | 0.000000 |

**Polar**  
ICSD 25378<sup>12</sup>

Space Group = 35  
 Full Formula (V2 Mo1 O8)  
 Reduced Formula: V2MoO8  
 abc : 9.759683 9.759683 4.058949  
 angles: 90.000000 90.000000 158.426990  
 Sites (11)  
 0 V 0.811827 0.188173 0.958236  
 1 V 0.188173 0.811827 0.958236  
 2 Mo 0.000000 0.000000 0.982470  
 3 O 0.812838 0.187162 0.565521  
 4 O 0.187162 0.812838 0.565521  
 5 O 0.902124 0.097876 0.053157  
 6 O 0.097876 0.902124 0.053157  
 7 O 0.000000 0.000000 0.561671  
 8 O 0.290918 0.709082 0.040288  
 9 O 0.709082 0.290918 0.040288  
 10 O 0.500000 0.500000 0.074453

Anti-polar 28471<sup>13</sup>

Space Group = 12  
 Full Formula (V2 Mo1 O8)  
 Reduced Formula: V2MoO8  
 abc : 9.775701 9.775701 3.842561  
 angles: 89.741754 90.258246 158.122438  
 Sites (11)  
 0 V 0.189764 0.810236 0.088884  
 1 V 0.810236 0.189764 0.911116  
 2 Mo 0.000000 0.000000 0.000000  
 3 O 0.291238 0.708762 0.992766  
 4 O 0.708762 0.291238 0.007234  
 5 O 0.500000 0.500000 0.000000  
 6 O 0.098812 0.901188 0.005565  
 7 O 0.901188 0.098812 0.994435  
 8 O 0.188971 0.811029 0.505827  
 9 O 0.811029 0.188971 0.494173  
 10 O 0.000000 1.000000 0.500000

## N. Zn<sub>2</sub>BrN

### Non-polar

Space Group = 62  
 Full Formula (Zn8 Br4 N4)  
 Reduced Formula: Zn<sub>2</sub>BrN  
 abc : 6.055989 6.181249 7.584113  
 angles: 90.000000 90.000000 90.000000  
 Sites (16)  
 0 Zn 0.250000 0.881036 0.675358  
 1 Zn 0.750000 0.118964 0.324642  
 2 Zn 0.750000 0.618964 0.175358  
 3 Zn 0.250000 0.381036 0.824642  
 4 Zn 0.500000 0.000000 0.000000  
 5 Zn 0.500000 0.500000 0.500000

|       |          |          |          |
|-------|----------|----------|----------|
| 6 Zn  | 0.000000 | 0.000000 | 0.000000 |
| 7 Zn  | 0.000000 | 0.500000 | 0.500000 |
| 8 Br  | 0.250000 | 0.089065 | 0.383681 |
| 9 Br  | 0.750000 | 0.910935 | 0.616319 |
| 10 Br | 0.750000 | 0.410935 | 0.883681 |
| 11 Br | 0.250000 | 0.589065 | 0.116319 |
| 12 N  | 0.250000 | 0.576744 | 0.627947 |
| 13 N  | 0.750000 | 0.423256 | 0.372053 |
| 14 N  | 0.750000 | 0.923256 | 0.127947 |
| 15 N  | 0.250000 | 0.076744 | 0.872053 |

**Polar**ICSD 425736<sup>14</sup>

Space Group = 33

Full Formula (Zn8 Br4 N4)

Reduced Formula: Zn<sub>2</sub>BrN

abc : 6.028627 6.190893 7.526637

angles: 90.000000 90.000000 90.000000

Sites (16)

|       |          |          |          |
|-------|----------|----------|----------|
| 0 Zn  | 0.407114 | 0.020372 | 0.966621 |
| 1 Zn  | 0.407114 | 0.520372 | 0.533379 |
| 2 Zn  | 0.907114 | 0.979628 | 0.033379 |
| 3 Zn  | 0.907114 | 0.479628 | 0.466621 |
| 4 Zn  | 0.088408 | 0.871921 | 0.680893 |
| 5 Zn  | 0.088408 | 0.371921 | 0.819107 |
| 6 Zn  | 0.588408 | 0.128079 | 0.319107 |
| 7 Zn  | 0.588408 | 0.628079 | 0.180893 |
| 8 Br  | 0.127831 | 0.084973 | 0.380191 |
| 9 Br  | 0.127831 | 0.584973 | 0.119809 |
| 10 Br | 0.627831 | 0.915027 | 0.619809 |
| 11 Br | 0.627831 | 0.415027 | 0.880191 |
| 12 N  | 0.124696 | 0.572675 | 0.627404 |
| 13 N  | 0.124696 | 0.072675 | 0.872596 |
| 14 N  | 0.624696 | 0.427325 | 0.372596 |
| 15 N  | 0.624696 | 0.927325 | 0.127404 |

**O. Zn<sub>2</sub>BrN****Non-polar**

Space Group = 62

Full Formula (Zn8 N4 Cl4)

Reduced Formula: Zn<sub>2</sub>NCl

abc : 5.957168 6.090093 7.412435

angles: 90.000000 90.000000 90.000000

Sites (16)

|      |          |          |          |
|------|----------|----------|----------|
| 0 Zn | 0.250000 | 0.101155 | 0.337185 |
| 1 Zn | 0.750000 | 0.898845 | 0.662815 |
| 2 Zn | 0.750000 | 0.398845 | 0.837185 |
| 3 Zn | 0.250000 | 0.601155 | 0.162815 |
| 4 Zn | 0.500000 | 0.000000 | 0.000000 |
| 5 Zn | 0.500000 | 0.500000 | 0.500000 |
| 6 Zn | 0.000000 | 0.000000 | 0.000000 |
| 7 Zn | 0.000000 | 0.500000 | 0.500000 |



|       |          |          |          |
|-------|----------|----------|----------|
| 8 N   | 0.250000 | 0.413056 | 0.370896 |
| 9 N   | 0.750000 | 0.586944 | 0.629104 |
| 10 N  | 0.750000 | 0.086944 | 0.870896 |
| 11 N  | 0.250000 | 0.913056 | 0.129104 |
| 12 Cl | 0.250000 | 0.907146 | 0.612393 |
| 13 Cl | 0.750000 | 0.092854 | 0.387607 |
| 14 Cl | 0.750000 | 0.592854 | 0.112393 |
| 15 Cl | 0.250000 | 0.407146 | 0.887607 |

**Polar**ICSD 425734<sup>14</sup>

Space Group = 33

Full Formula (Zn8 N4 Cl4)

Reduced Formula: Zn2NCl

abc : 5.895180 6.102977 7.278818

angles: 90.000000 90.000000 90.000000

Sites (16)

|       |          |          |          |
|-------|----------|----------|----------|
| 0 Zn  | 0.574308 | 0.115385 | 0.828615 |
| 1 Zn  | 0.574308 | 0.615385 | 0.671385 |
| 2 Zn  | 0.074308 | 0.884615 | 0.171385 |
| 3 Zn  | 0.074308 | 0.384615 | 0.328615 |
| 4 Zn  | 0.920855 | 0.971716 | 0.547057 |
| 5 Zn  | 0.920855 | 0.471716 | 0.952943 |
| 6 Zn  | 0.420855 | 0.028284 | 0.452943 |
| 7 Zn  | 0.420855 | 0.528284 | 0.047057 |
| 8 N   | 0.124792 | 0.080968 | 0.372195 |
| 9 N   | 0.124792 | 0.580968 | 0.127805 |
| 10 N  | 0.624792 | 0.919032 | 0.627805 |
| 11 N  | 0.624792 | 0.419032 | 0.872195 |
| 12 Cl | 0.128096 | 0.585889 | 0.620540 |
| 13 Cl | 0.128096 | 0.085889 | 0.879460 |
| 14 Cl | 0.628096 | 0.414111 | 0.379460 |
| 15 Cl | 0.628096 | 0.914111 | 0.120540 |

**P. AlAgO<sub>2</sub>****Non-polar**

Space Group = 62

Full Formula (Al4 Ag4 O8)

Reduced Formula: AlAgO2

abc : 5.274923 5.696013 6.676147

angles: 90.000000 90.000000 90.000000

Sites (16)

|      |          |          |          |
|------|----------|----------|----------|
| 0 Al | 0.400286 | 0.250000 | 0.370442 |
| 1 Al | 0.599714 | 0.750000 | 0.629558 |
| 2 Al | 0.099714 | 0.750000 | 0.870442 |
| 3 Al | 0.900286 | 0.250000 | 0.129558 |
| 4 Ag | 0.416658 | 0.250000 | 0.828669 |
| 5 Ag | 0.583342 | 0.750000 | 0.171331 |
| 6 Ag | 0.083342 | 0.750000 | 0.328669 |
| 7 Ag | 0.916658 | 0.250000 | 0.671331 |
| 8 O  | 0.065520 | 0.250000 | 0.359415 |
| 9 O  | 0.934480 | 0.750000 | 0.640585 |

|    |   |          |          |          |
|----|---|----------|----------|----------|
| 10 | 0 | 0.434480 | 0.750000 | 0.859415 |
| 11 | 0 | 0.565520 | 0.250000 | 0.140585 |
| 12 | 0 | 0.000000 | 0.500000 | 0.000000 |
| 13 | 0 | 0.500000 | 0.500000 | 0.500000 |
| 14 | 0 | 0.000000 | 0.000000 | 0.000000 |
| 15 | 0 | 0.500000 | 0.000000 | 0.500000 |

**Polar**ICSD 99688<sup>15</sup>

Space Group = 33

Full Formula (Al4 Ag4 O8)

Reduced Formula: AlAgO2

abc : 5.355008 5.452759 6.910347

angles: 90.000000 90.000000 90.000000

Sites (16)

|    |    |          |          |          |
|----|----|----------|----------|----------|
| 0  | Al | 0.071100 | 0.122459 | 0.375838 |
| 1  | Al | 0.571100 | 0.122459 | 0.124162 |
| 2  | Al | 0.928900 | 0.622459 | 0.624162 |
| 3  | Al | 0.428900 | 0.622459 | 0.875838 |
| 4  | Ag | 0.557787 | 0.130267 | 0.643986 |
| 5  | Ag | 0.057787 | 0.130267 | 0.856014 |
| 6  | Ag | 0.442213 | 0.630267 | 0.356014 |
| 7  | Ag | 0.942213 | 0.630267 | 0.143986 |
| 8  | O  | 0.109072 | 0.558503 | 0.833631 |
| 9  | O  | 0.609072 | 0.558503 | 0.666369 |
| 10 | O  | 0.890928 | 0.058503 | 0.166369 |
| 11 | O  | 0.390928 | 0.058503 | 0.333631 |
| 12 | O  | 0.965947 | 0.936740 | 0.568412 |
| 13 | O  | 0.465947 | 0.936740 | 0.931588 |
| 14 | O  | 0.034053 | 0.436740 | 0.431588 |
| 15 | O  | 0.534053 | 0.436740 | 0.068412 |

- 
- <sup>1</sup> T. Schleid, Zeitschrift für anorganische und allgemeine Chemie **625**, 1700 (1999), ISSN 1521-3749, URL [http://dx.doi.org/10.1002/\(SICI\)1521-3749\(199910\)625:10<1700::AID-ZAAC1700>3.0.CO;2-5](http://dx.doi.org/10.1002/(SICI)1521-3749(199910)625:10<1700::AID-ZAAC1700>3.0.CO;2-5).
- <sup>2</sup> G. V. Kozlov, A. A. Volkov, J. F. Scott, G. E. Feldkamp, and J. Petzelt, Phys. Rev. B **28**, 255 (1983), URL <http://link.aps.org/doi/10.1103/PhysRevB.28.255>.
- <sup>3</sup> A. K. Tagantsev, Ferroelectrics **79**, 57 (1988).
- <sup>4</sup> B. Marinder, P.-L. Wang, and P. Werner, Acta. Chem. Scand. **40**, 467 (1986).
- <sup>5</sup> S. Andersson, Acta. Chem. Scand. **19**, 2285 (1965).
- <sup>6</sup> Z.-H. Liang, K.-B. Tang, Q.-W. Chen, and H.-G. Zheng, Acta Crystallographica Section E **65**, i44 (2009), URL <http://dx.doi.org/10.1107/S1600536809018157>.
- <sup>7</sup> K. Schwendtner and U. Kolitsch, Mineralogical Magazine **71** (2007, publication date =).
- <sup>8</sup> T. Krger and H. Müller-Buschbaum, Journal of Alloys and Compounds **190**, L1 (1992), ISSN 0925-8388, URL <http://www.sciencedirect.com/science/article/pii/S0925838892901564>.
- <sup>9</sup> J. Galy, C. Satto, P. Sciau, and P. Millet, Journal of Solid State Chemistry **146**, 129 (1999), ISSN 0022-4596, URL <http://www.sciencedirect.com/science/article/pii/S002245969993184>.
- <sup>10</sup> M.-P. Crosnier-Lopez, H. Duroy, J.-L. Fourquet, and M. Abrabri, European journal of solid state and inorganic chemistry **31**, 957 (1994).
- <sup>11</sup> A. Castro, P. Millan, R. Enjalbert, E. Snoeck, and J. Galy, Materials Research Bulletin **29**, 871 (1994), ISSN 0025-5408, URL <http://www.sciencedirect.com/science/article/pii/S0025540894900078>.
- <sup>12</sup> P. Mahé-Pailleret, Ph.D. thesis (1969).
- <sup>13</sup> P. P. B. J. F. W., and A. RIMSKY, COMPTES RENDUS HEBDOMADAIRES DES SEANCES DE L ACADEMIE DES SCIENCES SERIE C **263**, 1131 (1966).
- <sup>14</sup> X. Liu, C. Wessel, F. Pan, and R. Dronskowski, Journal of Solid State Chemistry **203**, 31 (2013), ISSN 0022-4596, URL <http://www.sciencedirect.com/science/article/pii/S0022459613001692>.

- <sup>15</sup> J. Li and A. Sleight, *Journal of Solid State Chemistry* **177**, 889 (2004), ISSN 0022-4596, URL <http://www.sciencedirect.com/science/article/pii/S0022459603005371>.
